# Supplementary material for: Long non-coding SBF2-AS1 acting as a competing endogenous RNA to sponge microRNA-142-3p to participate in gemcitabine resistance in pancreatic cancer via upregulating TWF1
Source: publisher site journal article supplement (doi:10.18632/aging.102307), 2019-10-16
Supplement: Supplementary file [file aging-v11i20-102307-supplementary-material-SD1.pdf]

## SUPPLEMENTARY FIGURE

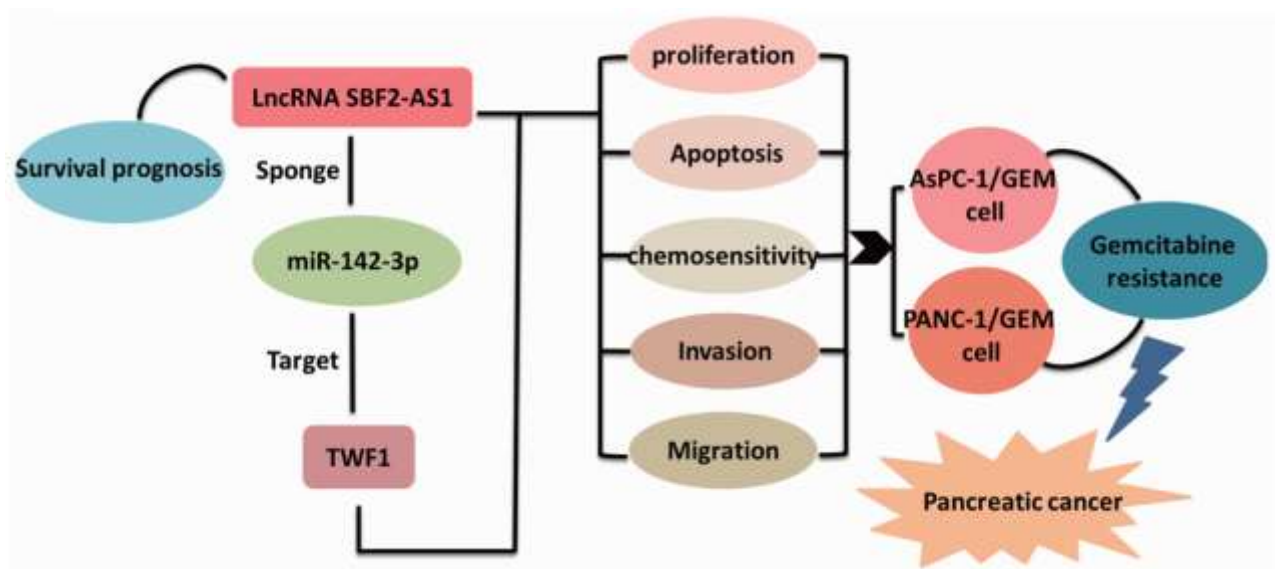

**Supplementary Figure 1.** The schematic diagram of LncRNA SBF2-AS1/miR-142-3p/TWF1 in pancreatic cancer. LncRNA SBF2-AS1, as a ceRNA of miR-142-3p to regulate TWF1, is involved in the mechanism of gemcitabine resistance in pancreatic cancer.
